# Supplementary material for: A Comparison of Evoked and Non-evoked Functional Networks
Source: PubMed Central journal article supplement (PMC6476864; doi:10.1007/s10548-018-0692-1), 2018-12-06
Supplement: 10548_2018_692_MOESM2_ESM.pdf [file 10548_2018_692_MOESM2_ESM.pdf]

# A comparison of evoked and non-evoked functional networks

## Supplementary material 2: Results in other patients

Jurgen Hebbink<sup>1,2</sup>, Dorien van Blooijis<sup>1</sup>, Geertjan Huiskamp<sup>1</sup>,  
Frans S.S. Leijten<sup>1</sup>, Stephan A. van Gils<sup>2</sup> and Hil G.E. Meijer<sup>2</sup>

<sup>1</sup>Department of Neurology and Neurosurgery, Brain Center Rudolf Magnus, University Medical Centre Utrecht, Heidelberglaan 100, 3584 CX Utrecht, The Netherlands

<sup>2</sup>Department of Applied Mathematics, MIRA Institute for Biomedical Engineering and Technical Medicine, University of Twente, Drienerlolaan 5, 7500 AE Enschede, The Netherlands

October 4, 2018

## 1 Detailed results of other patients

In this appendix we show detailed results of comparing SPES to cross-correlation (CC) and Granger Causality (GC) for patients 1 and 3-6. Figures 1-5 show for each patient the schematic layout of the electrode configuration as well as the comparison between SPES and CC and SPES and GC in the same way as Figures 1 and 3 of the main text. The results in these patients are similar to those of patient 2, which are presented in the main part of our work.

# Patient 1

(a) Electrode configuration

|    |    |    |    |    |    |    |    |
|----|----|----|----|----|----|----|----|
| 56 | 55 | 54 | 53 | 52 | 51 | 50 | 49 |
| 1  | 2  | 3  | 4  | 5  | 6  | 7  | 8  |
| 9  | 10 | 11 | 12 | 13 | 14 | 15 | 16 |
| 17 | 18 | 19 | 20 | 21 | 22 | 23 | 24 |
| 25 | 26 | 27 | 28 | 29 | 30 | 31 | 32 |
| 33 | 34 | 35 | 36 | 37 | 38 | 39 | 40 |
| 41 | 42 | 43 | 44 | 45 | 46 | 47 | 48 |

(b) CC: Agreement at  $h^*$

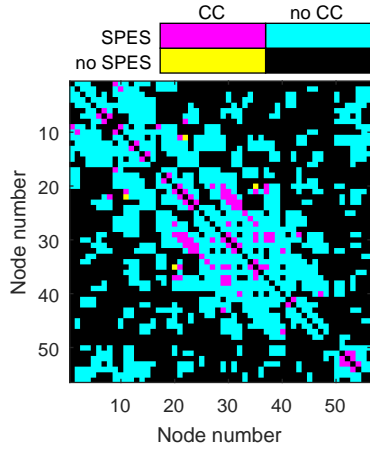

(c) CC: Histogram

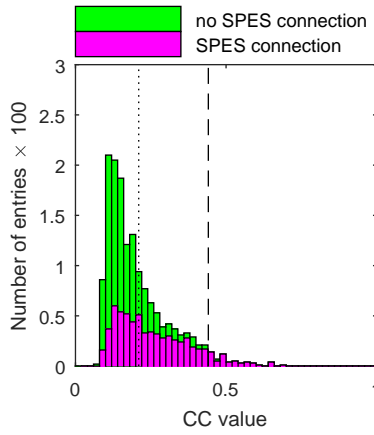

(d) CC: Agreement at  $h_{ma}$

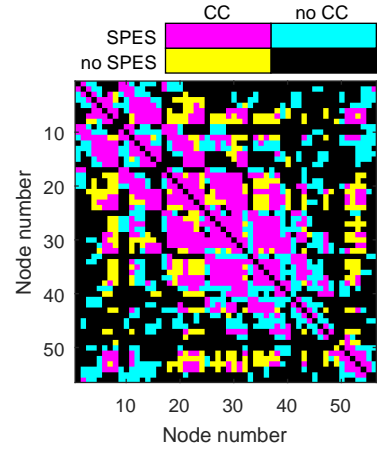

(e) GC: Agreement at  $h^*$

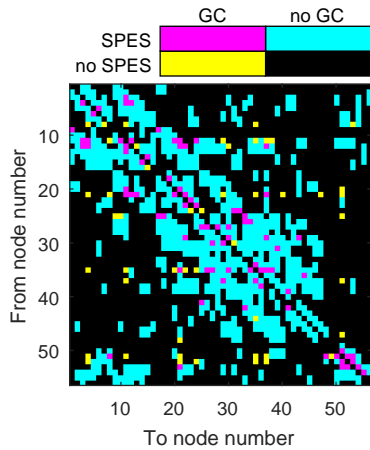

(f) GC: Histogram

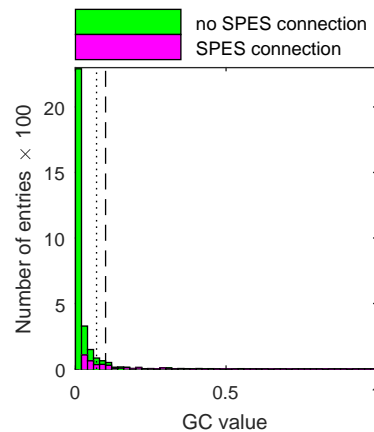

(g) GC: Agreement at  $h_{ma}$

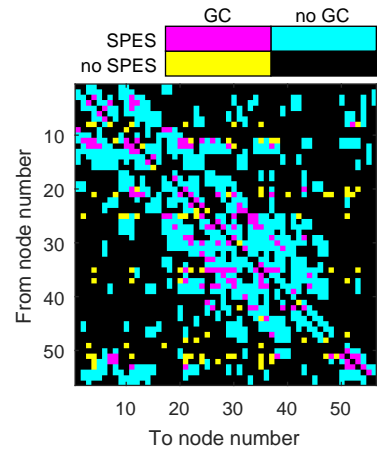

Figure 1: Results for patient 1.

# Patient 3

(a) Electrode configuration

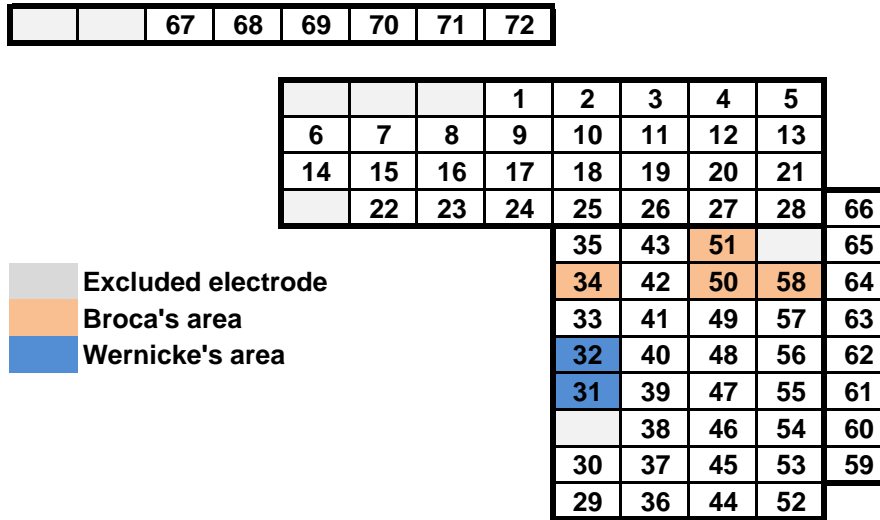

(b) CC: Agreement at  $h^*$

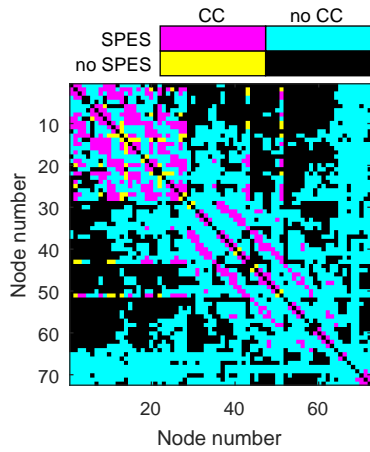

(c) CC: Histogram

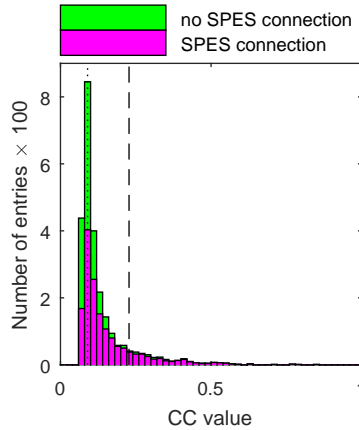

(d) CC: Agreement at  $h_{ma}$

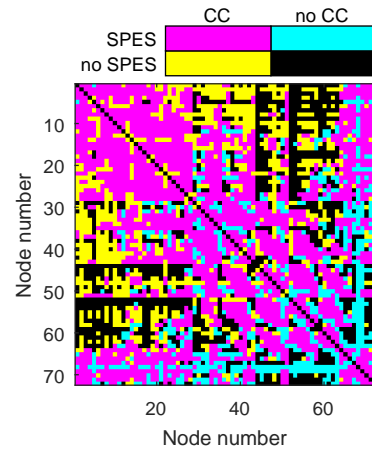

(e) GC: Agreement at  $h^*$

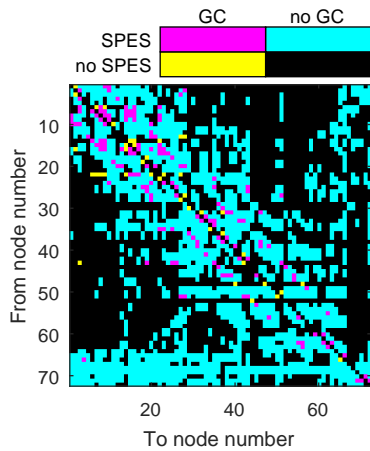

(f) GC: Histogram

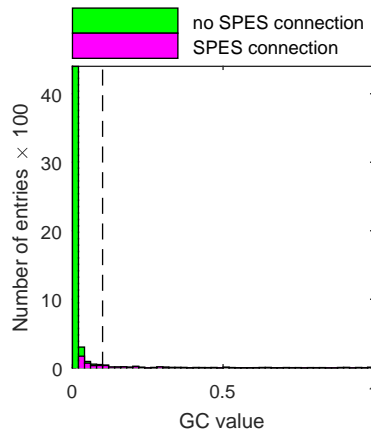

(g) GC: Agreement at  $h_{ma}$

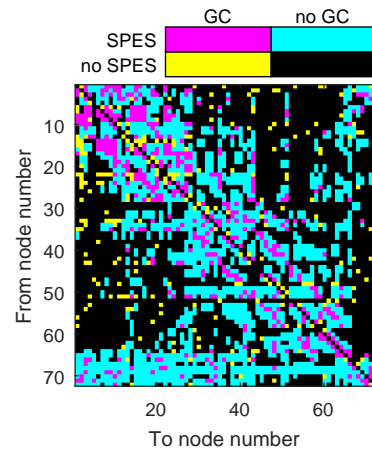

Figure 2: Results for patient 3.

# Patient 4

(a) Electrode configuration

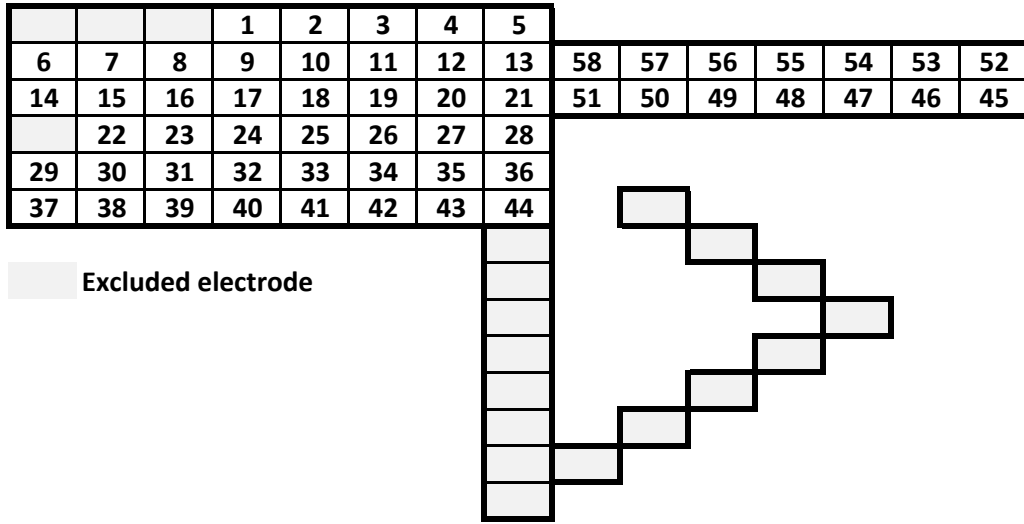

(b) CC: Agreement at  $h^*$

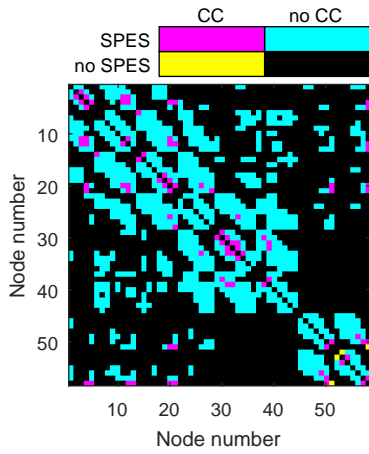

(c) CC: Histogram

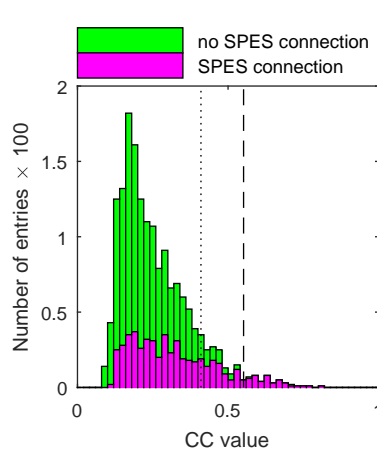

(d) CC: Agreement at  $h_{ma}$

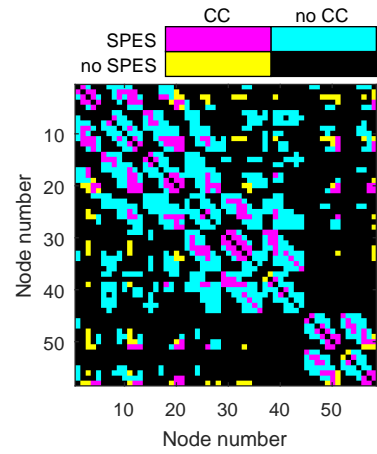

(e) GC: Agreement at  $h^*$

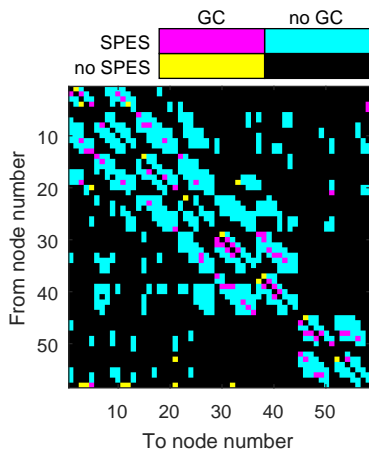

(f) GC: Histogram

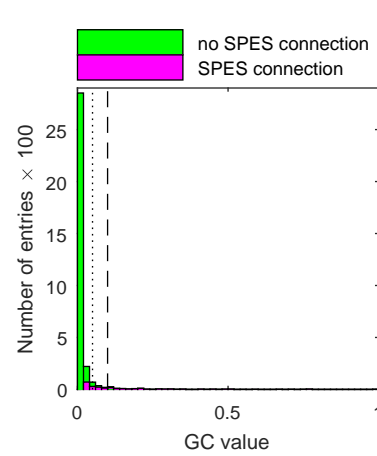

(g) GC: Agreement at  $h_{ma}$

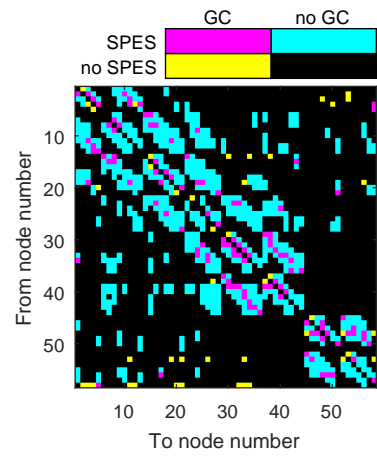

Figure 3: Results for patient 4.

# Patient 5

(a) Electrode configuration

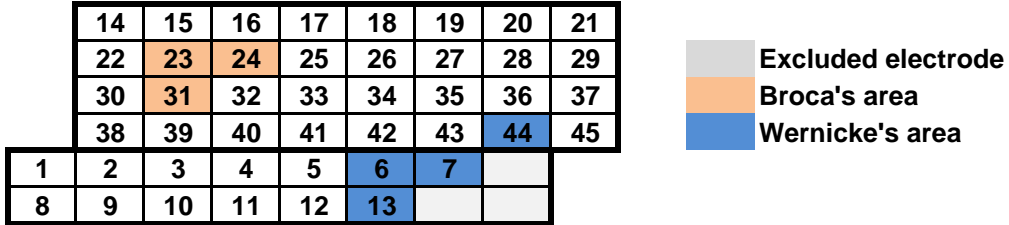

(b) CC: Agreement at  $h^*$

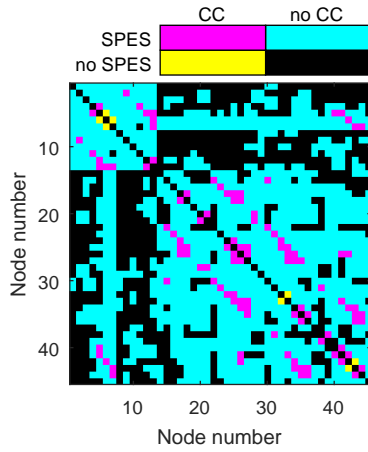

(c) CC: Histogram

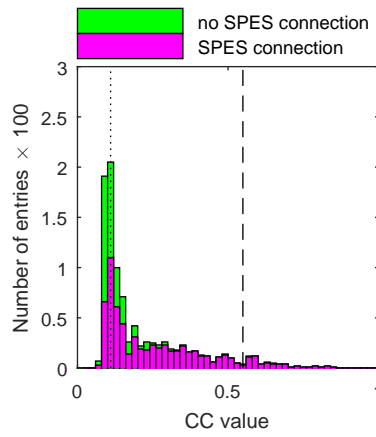

(d) CC: Agreement at  $h_{ma}$

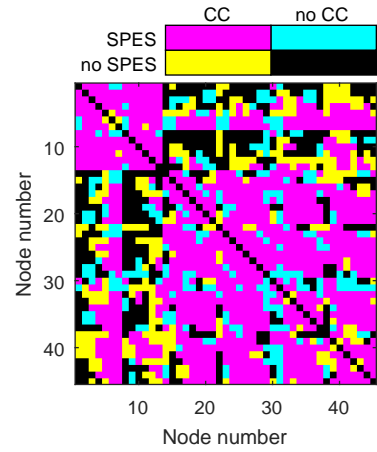

(e) GC: Agreement at  $h^*$

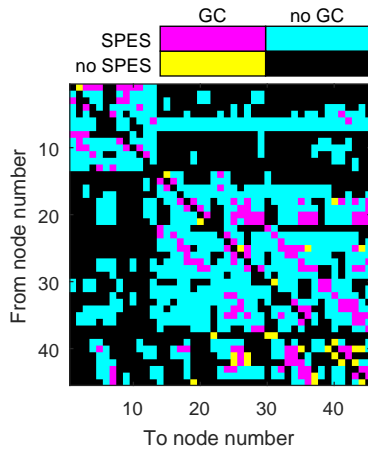

(f) GC: Histogram

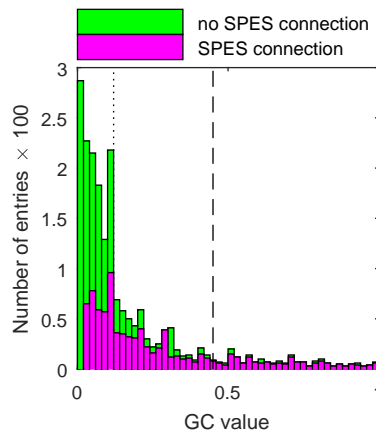

(g) GC: Agreement at  $h_{ma}$

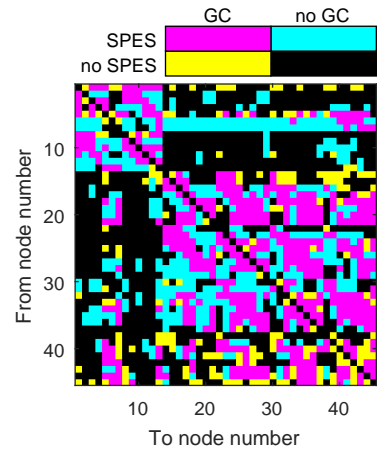

Figure 4: Results for patient 5.

# Patient 6

(a) Electrode configuration

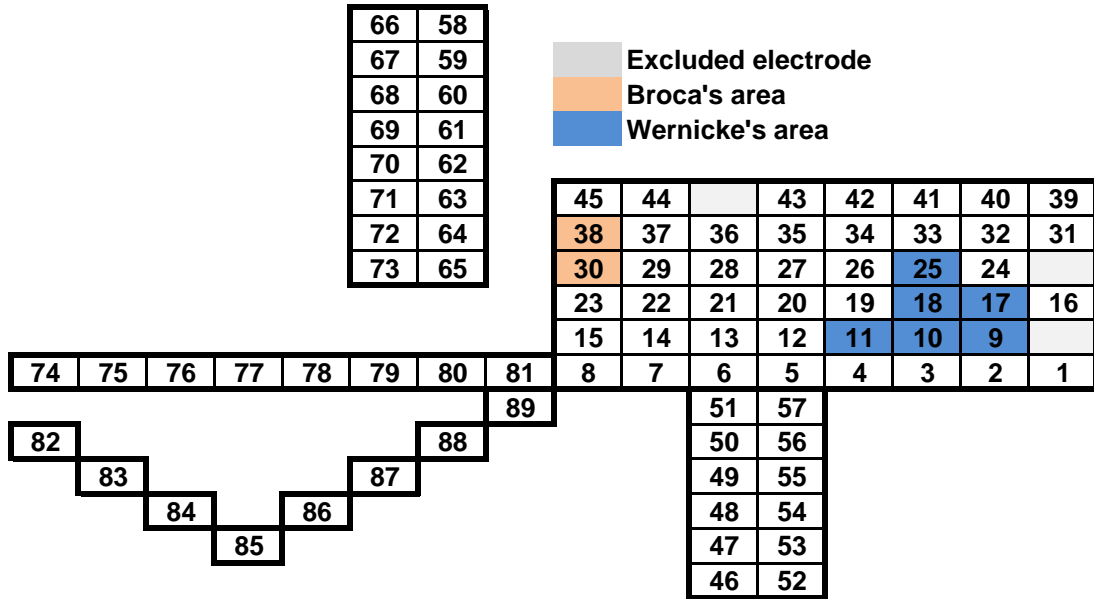

(b) CC: Agreement at  $h^*$

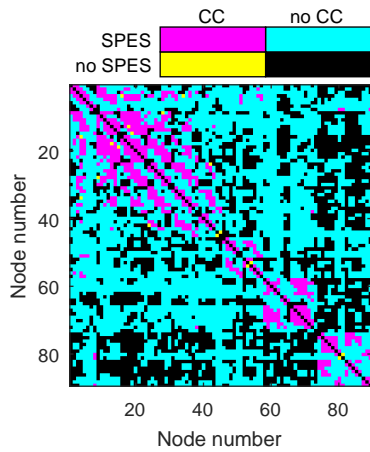

(c) CC: Histogram

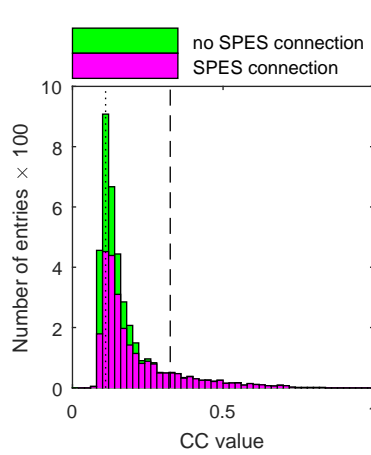

(d) CC: Agreement at  $h_{ma}$

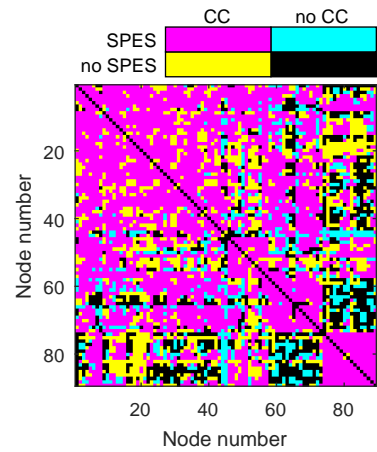

(e) GC: Agreement at  $h^*$

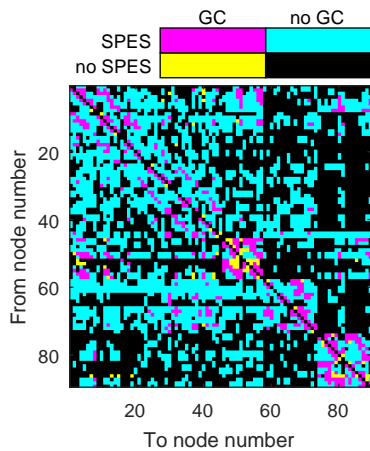

(f) GC: Histogram

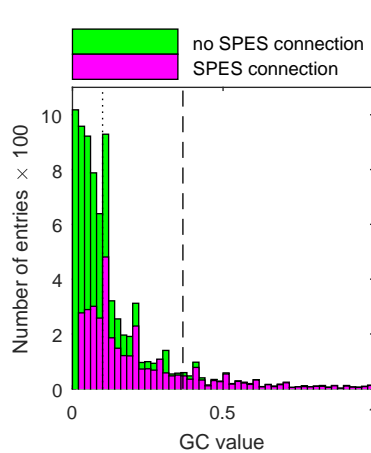

(g) GC: Agreement at  $h_{ma}$

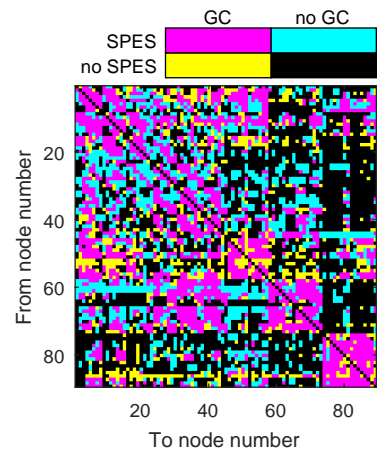

Figure 5: Results for patient 6.
